# Supplementary material for: Phenotypic and Genotypic Variation of Cultivated Panax quinquefolius
Source: MDPI journal article supplement (doi:10.3390/plants13020300), 2024-01-19
Supplement: s1 [file s1]

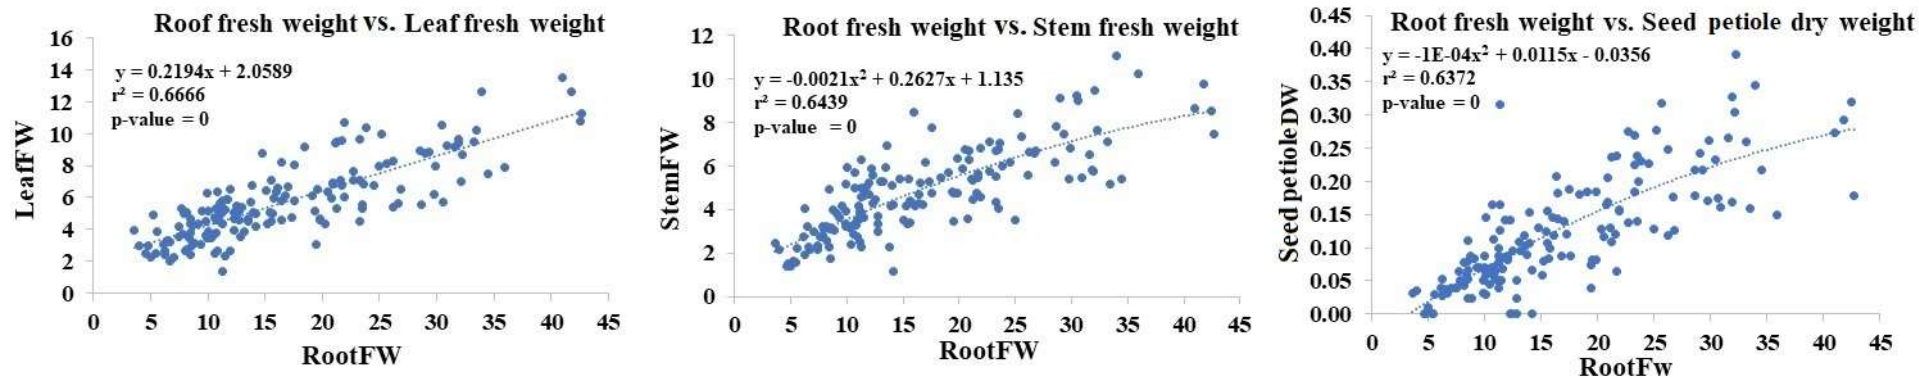

**Figure S1.** Correlation between root fresh weight and leaf fresh weight, root fresh weight and stem fresh weight, and root fresh weight and seed petiole dry weight for the 162 *P. quinquefolius* samples. Correlation equation, coefficients and p-value is presented in each graph.

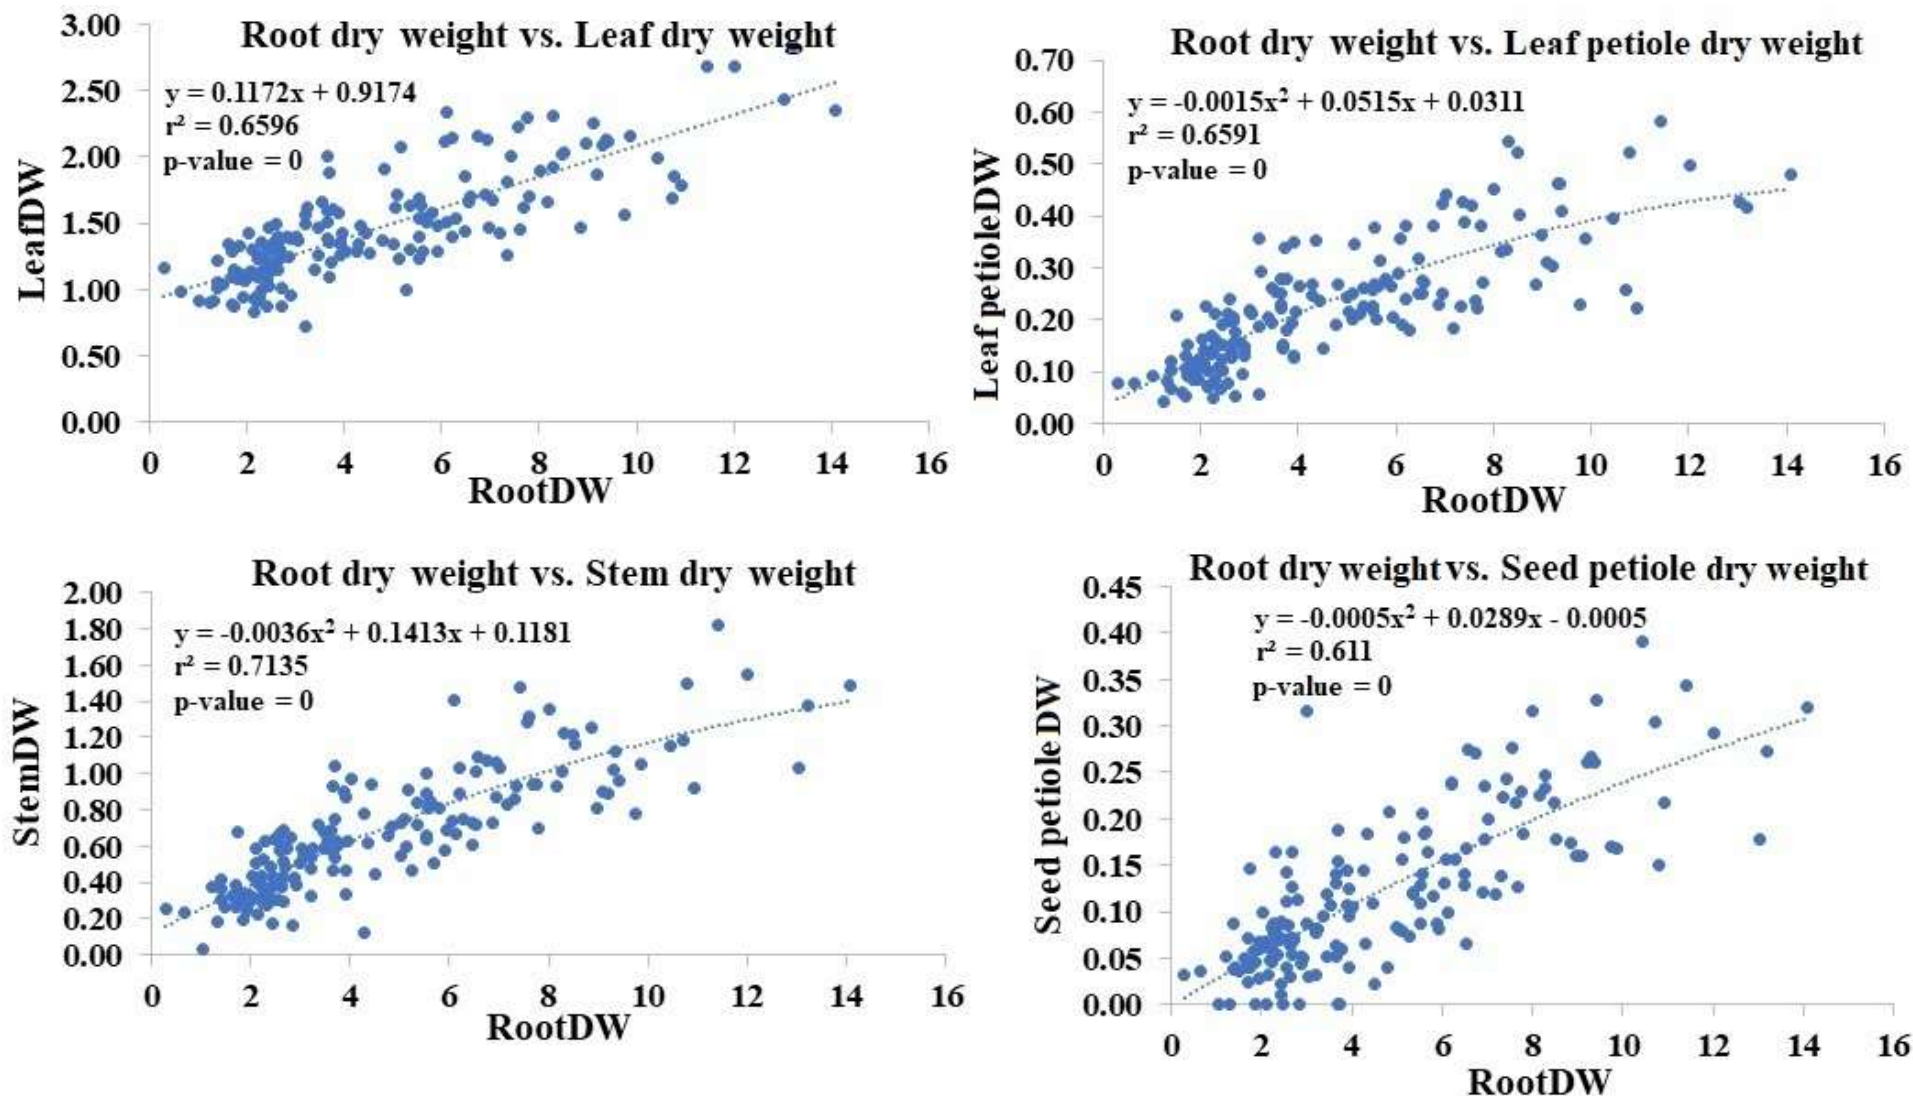

**Figure S2.** Correlation between root dry weight and leaf dry weight, root dry weight and leaf petiole dry weight, root dry weight and stem dry weight, and root dry weight and seed petiole dry weight for the 162 *P. quinquefolius* samples. Correlation equation, coefficients and p-value is presented in each graph.

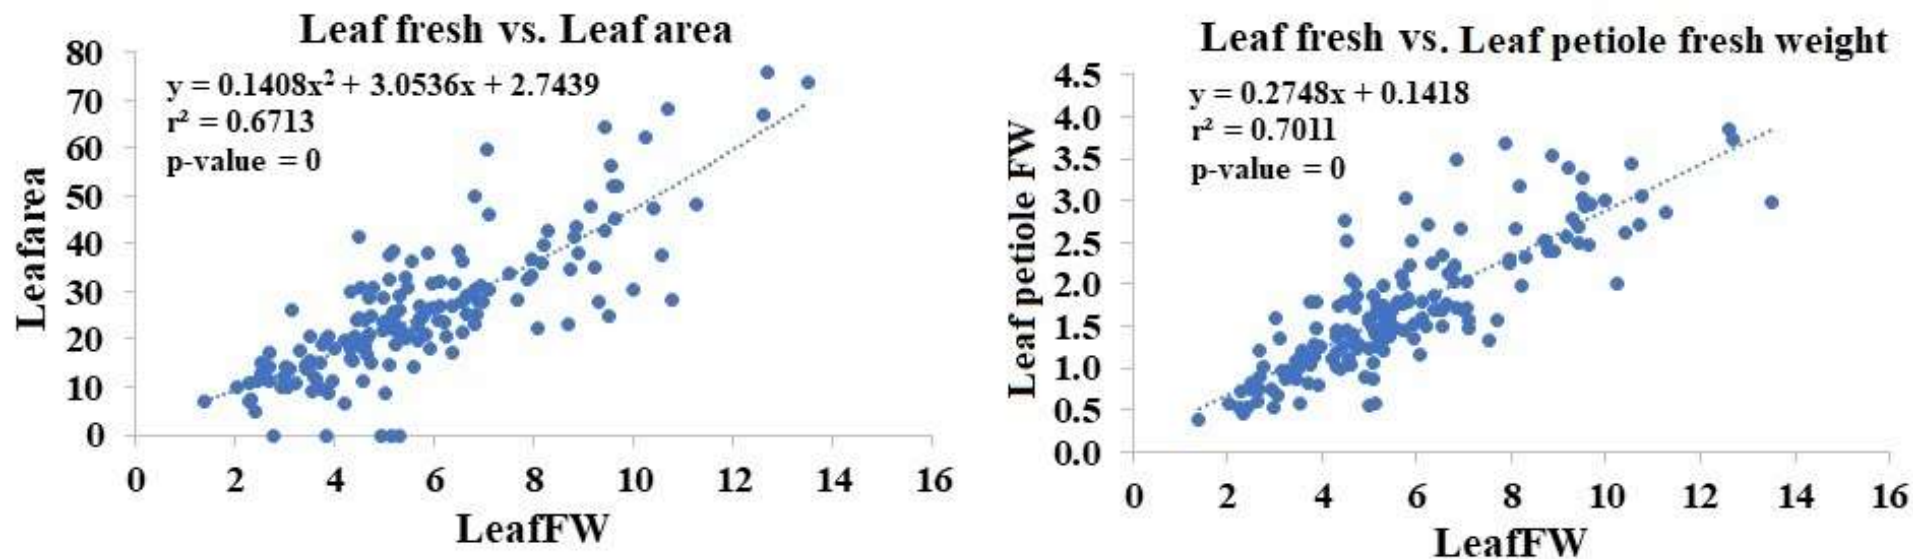

**Figure S3.** Correlation between leaf fresh weight and leaf area, and leaf fresh weight and leaf petiole fresh weight for the 162 *P. quinquefolius* samples. Correlation equation, coefficients and p-value is presented in each graph.



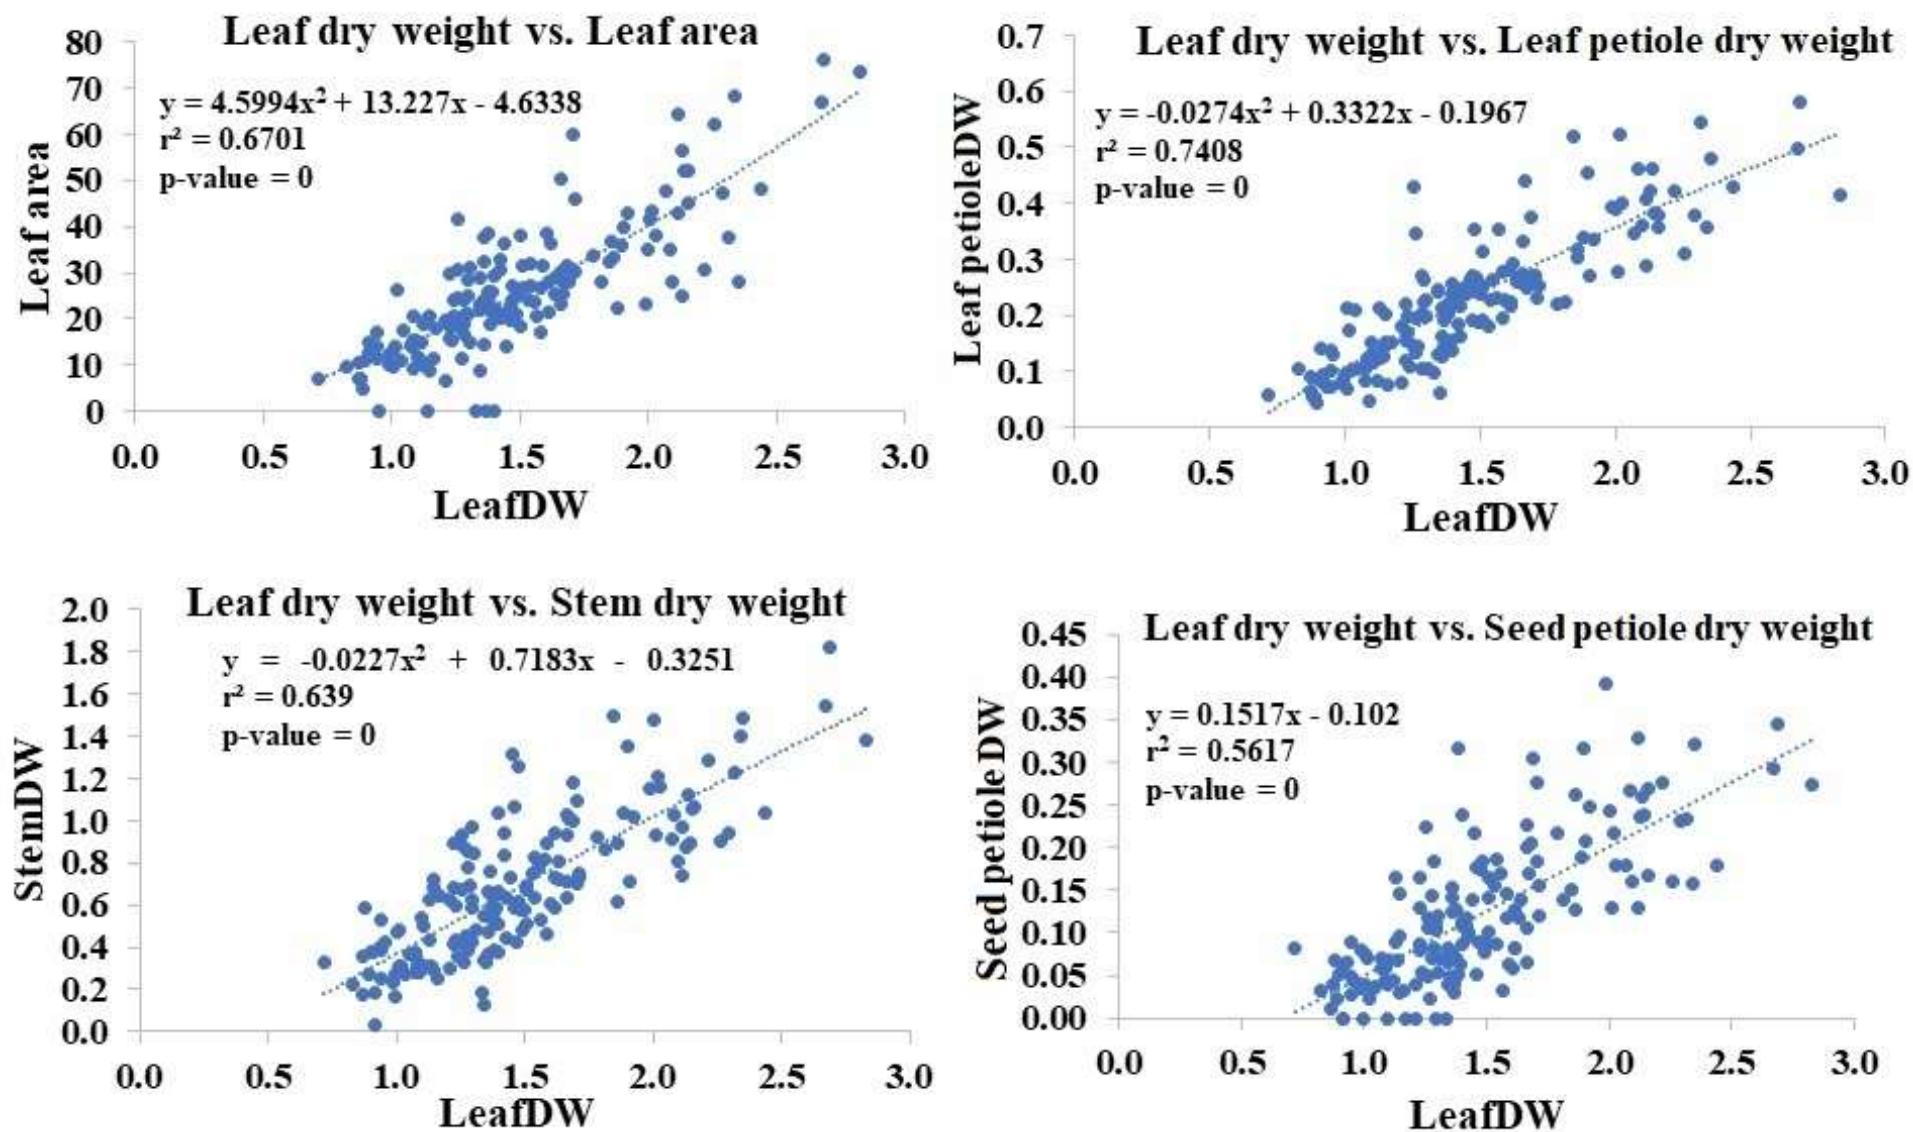

**Figure S4.** Correlation between leaf dry weight and leaf are, leaf dry weight and leaf petiole dry weight, leaf dry weight and stem dry weight, and leaf dry weight and seed petiole dry weight for the 162 *P. quinquefolius* samples. Correlation equation, coefficients and p-value is presented in each graph.

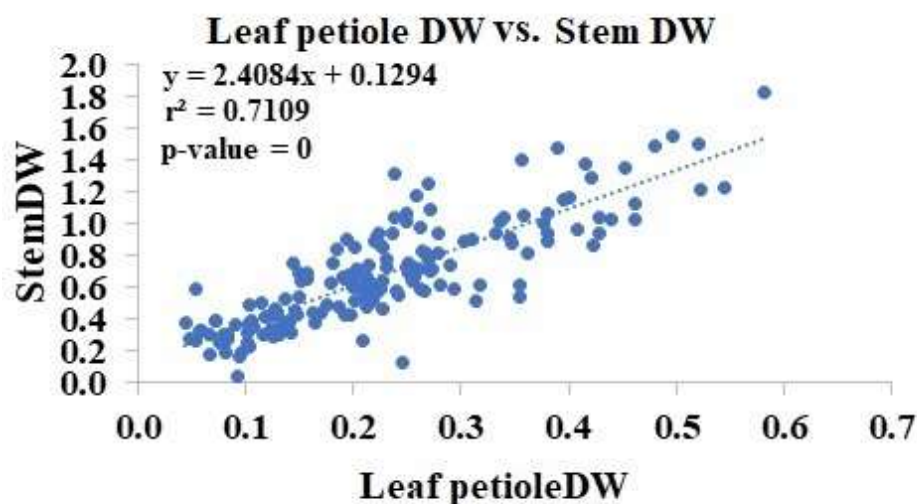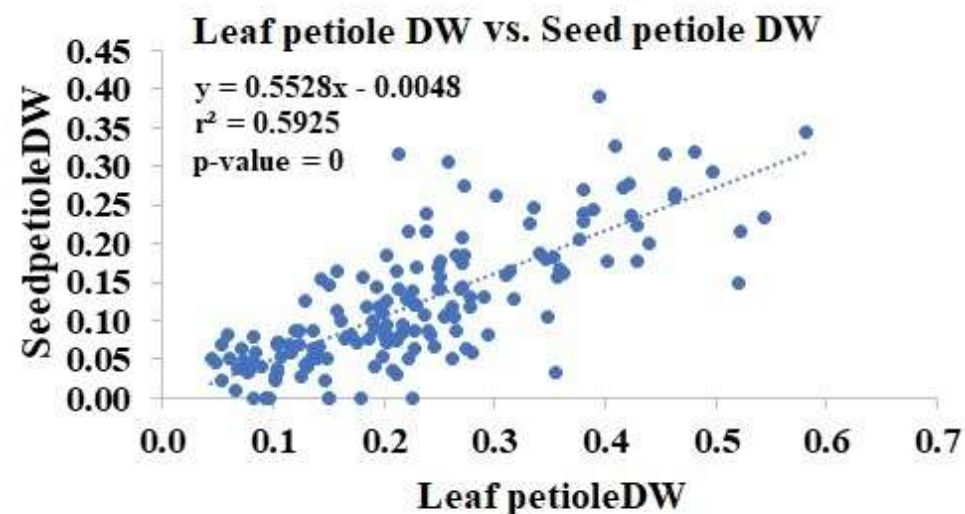

**Figure S5.** Correlation between leaf petiole dry weight and stem dry weight, and leaf petiole dry weight and seed petiole dry weight for the 162 *P. quinquefolius* samples. Correlation equation, coefficients and p-value is presented in each graph.

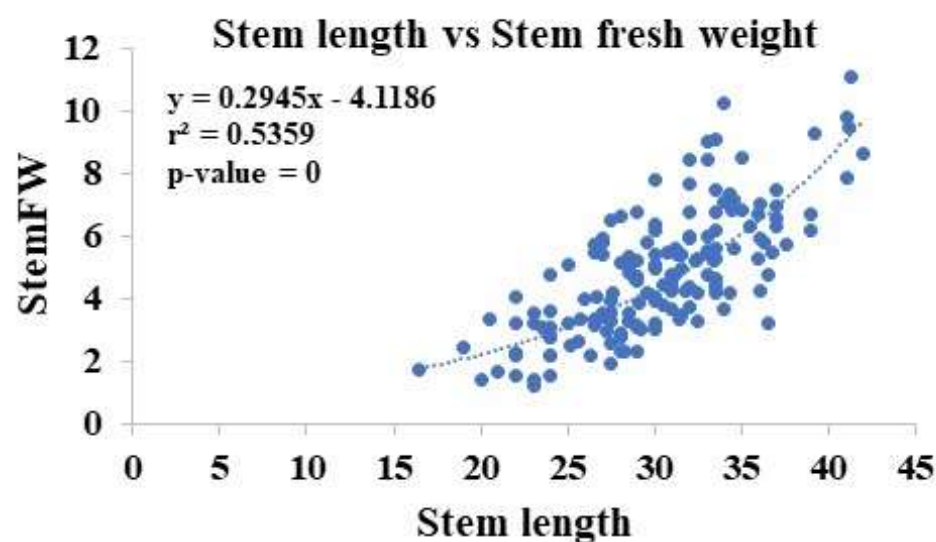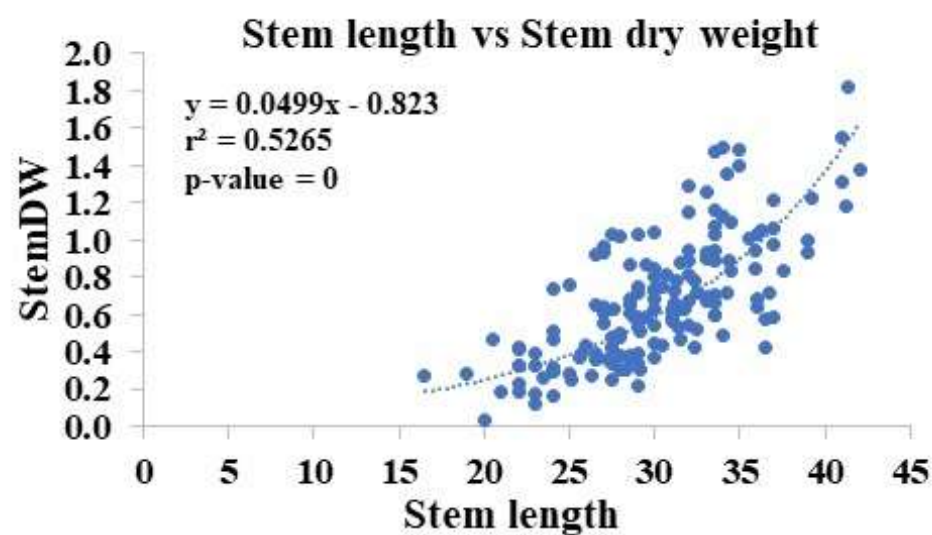

**Figure S6.** Correlation between stem length and stem fresh weight, and stem length and stem dry weight for the 162 *P. quinquefolius* samples. Correlation equation, coefficients and p-value is presented in each graph.

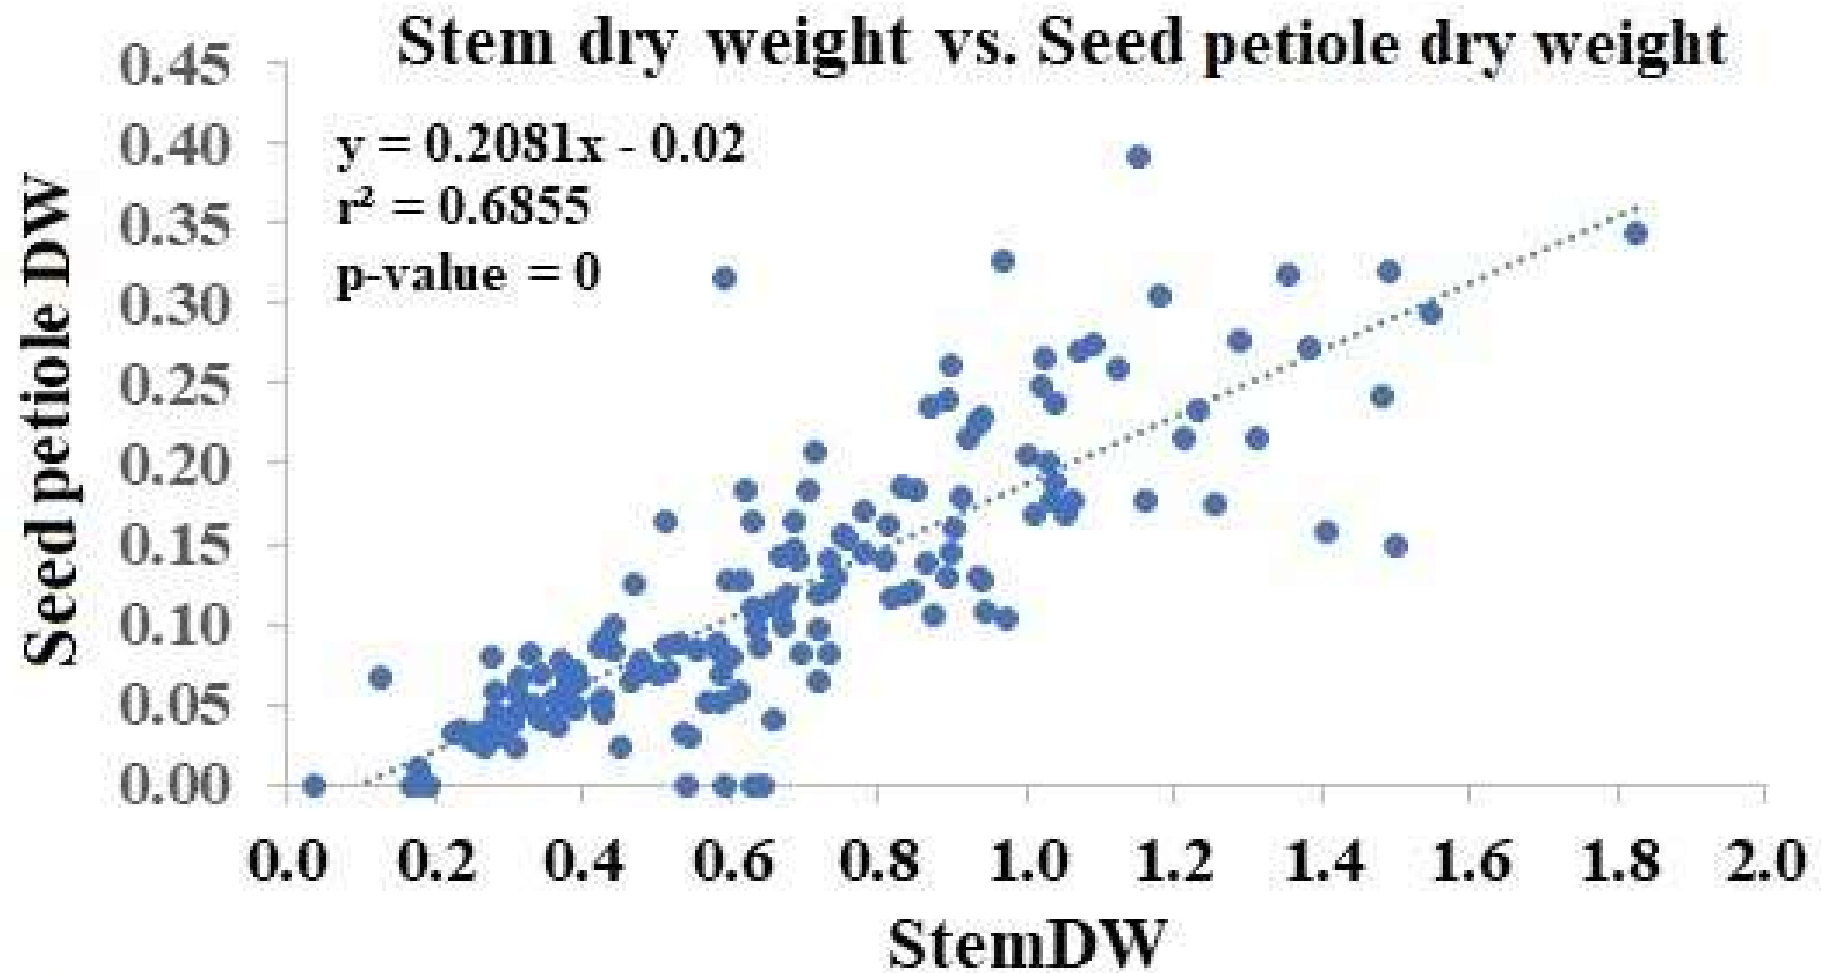

**Figure S7.** Correlation between stem dry weight and seed petiole dry weight for the 162 *P. quinquefolius* samples. Correlation equation, coefficients and p-value is presented in each graph.

**Figure S8.** Alignment using MUSCLE of PW16 sequences of 162 *P. quinquefolius* samples from a commercial ginseng garden near Simcoe, Ontario, Canada.

```

172      CTCCTGCCAAAGAAATTCAAGCGTCCTCACAAAGGGTTTAGTGCGCATCTCCCATCTTTG
229      CTCCTGCCAAAGAAATTCAAGCGTCCTCACAAAGGGTTTAGTGCGCATCTCCCATCTTTG
208      CTCCTGCCAAAGAAATTCAAGCGTCCTCACAAAGGGTTTAGTGCGCATCTCCCATCTTTG
83       CTCCTGCCAAAGAAATTCAAGCGTCCTCACAAAGGGTTTAGTGCGCATCTCCCATCTTTT
3        CTCCTGCCAAAGAAATTCAAGCGTCCTCACAAAGGGTTTAGTGCGCATCTCCCATCTTTT
120      CTCCTGCCAAAGAAATTCAAGCGTCCTCACAAAGGGTTTAGTGCGCATCTCCCATTTTGT
99       CTCCTGCCAAAGAAATTCAAGCGTCCTCACAAAGGGTTTAGTGCGCATCTCCCATCTTGT
126      CTCCTGCCAAAGAAATTCAAGCGTCCTCACAAAGGGTTTAGTGCGCATCTCCTAATTTTTT
173      CTCCTGCCAAAGAAATTCAAGCGTCCTCACAAAGGGTTTAGTGCGCATCTCCTAATTTTTT
204      CTCCTGCCAAAGAAATTCAAGCGTCCTCACAAAGGGTTTAGTGCGCATCTACCAATTTTTT
239      CTCCTGCCAAAGAAATTCAAGCGTCCTCACAAAGGGTTTAGTGCGCATCTCCTATCTTGT
117      CTCCTGCCAAAGAAATTCAAGCGTCCTCACAAAGGGTTTAGTGCGCATCTACCAACTCGT
123      CTCCTGCCAAAGAAATTCAAGCGTCCTCACAAAGGGTTTAGTGCGCATCTACCAACTCGT
210      CTCCTGCCAAAGAAATTCAAGCGTCCTCACAAAGGGTTTAGTGCGCATCTCCCATCTTGT
86       CTCCTGCCAAAGAAATTCAAGCGTCCTCACAAAGGGTTTAGTGCGCATCTCCCATCTTGT
100      CTCCTGCCAAAGAAATTCAAGCGTCCTCACAAAGGGTTTAGTGCGCATCTCCCATCTTGT
114      CTCCTGCCAAAGAAATTCAAGCGTCCTCACAAAGGGTTTAGTGCGCATCTCCCAACTCGT
170      CTCCTGCCAAAGAAATTCAAGCGTCCTCACAAAGGGTTTAGTGCGCATCTCCCAACTCGT
108      CTCCTGCCAAAGAAATTCAAGCGTCCTCACAAAGGGTTTAGTGCGCATCTCCCATCTTGT
174      CTCCTGCCAAAGAAATTCAAGCGTCCTCACAAAGGGTTTAGTGCGCATCTCCCATCTTGT
158      CTCCTGCCAAAGAAATTCAAGCGTCCTCACAAAGGGTTTAGTGCGCATCTCCCATCTTGT
154      CTCCTGCCAAAGAAATTCAAGCGTCCTCACAAAGGGTTTAGTGCGCATCTCCCATCTTGG
30       CTCCTGCCAAAGAAATTCAAGCGTCCTCACAAAGGGTTTAGTGCGCATCTCCCATCTTGT
39       CTCCTGCCAAAGAAATTCAAGCGTCCTCACAAAGGGTTTAGTGCGCATCTCCCATCTTGT
237      CTCCTGCCAAAGAAATTCAAGCGTCCTCACAAAGGGTTTAGTGCGCATCTCCCATCTTGT
65       CTCCTGCCAAAGAAATTCAAGCGTCCTCACAAAGGGTTTAGTGCGCATCTCCCATCTTGT
44       CTCCTGCCAAAGAAATTCAAGCGTCCTCACAAAGGGTTTAGTGCGCATCTACTATCTTGT
168      CTCCTGCCAAAGAAATTCAAGCGTCCTCACAAAGGGTTTAGTGCGCATCTCCCATCTTGT
95       CTCCTGCCAAAGAAATTCAAGCGTCCTCACAAAGGGTTTAGTGCGCATCTCCCATCTTGT
22       CTCCTGCCAAAGAAATTCAAGCGTCCTCACAAAGGGTTTAGTGCGCATCTCCCATCTTGT
79       CTCCTGCCAAAGAAATTCAAGCGTCCTCACAAAGGGTTTAGTGCGCATCTCCCATCTTGT
211      CTCCTGCCAAAGAAATTCAAGCGTCCTCACAAAGGGTTTAGTGCGCATCTCCCATCTTGT
88       CTCCTGCCAAAGAAATTCAAGCGTCCTCACAAAGGGTTTAGTGCGCATCTCCCATCTTGT
184      CTCCTGCCAAAGAAATTCAAGCGTCCTCACAAAGGGTTTAGTGCGCATCTCCCATCTTGT
78       CTCCTGCCAAAGAAATTCAAGCGTCCTCACAAAGGGTTTAGTGCGCATCTCCCATCTTGT
71       CTCCTGCCAAAGAAATTCAAGCGTCCTCACAAAGGGTTTAGTGCGCATCTCCCATCTTGT
196      CTCCTGCCAAAGAAATTCAAGCGTCCTCACAAAGGGTTTAGTGCGCATCTCCCATCTTGT
43       CTCCTGCCAAAGAAATTCAAGCGTCCTCACAAAGGGTTTAGTGCGCATCTCCCATCTTGT
151      CTCCTGCCAAAGAAATTCAAGCGTCCTCACAAAGGGTTTAGTGCGCATCTCCCATCTTGT
27       CTCCTGCCAAAGAAATTCAAGCGTCCTCACAAAGGGTTTAGTGCGCATCTCCCATCTTGT
197      CTCCTGCCAAAGAAATTCAAGCGTCCTCACAAAGGGTTTAGTGCGCATCTCCCATCTTGT
109      CTCCTGCCAAAGAAATTCAAGCGTCCTCACAAAGGGTTTAGTGCGCATCTCCCATCTTGT
169      CTCCTGCCAAAGAAATTCAAGCGTCCTCACAAAGGGTTTAGTGCGCATCTCCCATCTTGT
94       CTCCTGCCAAAGAAATTCAAGCGTCCTCACAAAGGGTTTAGTGCGCATCTCCCATCTTGT
232      CTCCTGCCAAAGAAATTCAAGCGTCCTCACAAAGGGTTTAGTGCGCATCTCCCATCTTGT
222      CTCCTGCCAAAGAAATTCAAGCGTCCTCACAAAGGGTTTAGTGCGCATCTCCCATCTTGT
24       CTCCTGCCAAAGAAATTCAAGCGTCCTCACAAAGGGTTTAGTGCGCATCTCCCATCTTGT
15       CTCCTGCCAAAGAAATTCAAGCGTCCTCACAAAGGGTTTAGTGCGCATCTCCCATCTTGT
13       CTCCTGCCAAAGAAATTCAAGCGTCCTCACAAAGGGTTTAGTGCGCATCTCCCATCTTGT
14       CTCCTGCCAAAGAAATTCAAGCGTCCTCACAAAGGGTTTAGTGCGCATCTCCCATCTTGT
35       CTCCTGCCAAAGAAATTCAAGCGTCCTCACAAAGGGTTTAGTGCGCATCTCCCATCTTGT
111      CTCCTGCCAAAGAAATTCAAGCGTCCTCACAAAGGGTTTAGTGCGCATCTCCCATCTTGT
157      CTCCTGCCAAAGAAATTCAAGCGTCCTCACAAAGGGTTTAGTGCGCATCTCCCATCTTGT

```



[illegible]

[illegible]

172 GACATTTGCCCACTAAACATATCATATGACAGGAAGGAGAAAGATAGTAAGCAACAAATC  
229 GACATTTGCCCACTAAACATATCATATGACAGGAAGGAGAAAGATAGTAAGCAACAAATC  
208 GACATTTGCCCACTAAACATATCATATGACAGGAAGGAGAAAGATAGTAAGCAACAAATC

[illegible]

[illegible]

[illegible]



[illegible]

[illegible]



[illegible]

[illegible]





[illegible]

[illegible]



[illegible]



[illegible]

81 CAGGTCAAAACATTTTAAACTTGAACCAGCAACATCAATTAAACCTAGCAGCTTAAAACT  
103 CAGGTCAAAACATTTTAAACTTGAACCAGCAACATCAATTAAACCTAGCAGCTTAAAACT  
113 CAGGTCAAAACATTTTAAACTTGAACCAGCAACATCAATTAAACCTAGCAGCTTAAAACT  
163 CAGGTCAAAACATTTTAAACTTGAACCAGCAACATCAATTAAACCTAGCAGCTTAAAACT  
40 CAGGTCAAAACATTTTAAACTTGAACCAGCAATATCAATTAAACCTAGCAGCTTAAAACT  
56 CAGGTCAAAACATTTTAAACTTGAACCAGCAATATCAATTAAACCTAGCAGCTTAAAACT  
218 CAGGTCAAAACATTTTAAACTTGAACCAGCAATATCAATTAAACCTAGCAGCTTAAAACT  
41 CAGGTCAAAACATTTTAAACTTGAACCAGCAATATCAATTAAACCTAGCAGCTTAAAACT  
42 CAGGTCAAAACATTTTAAACTTGAACCAGCAACATCAATTTAACCTAGCAGCTTAAAACT  
160 CAGGTCAAAACATTTTAAACTTGAACCAGCAACATCAATTAAACCTAGCAGCTTAAAACT  
5 CAGGTCAAAACATTTTAAACTTGAACCAGCAACATCAATTAAACCTAGCAGCTTAAAACT  
228 CAGGTCAAAACATTTTAAACTTGAACCAGCAACATCAATTAAACCTAGCAGCTTAAAACT  
17 CAGGTCAAAACATTTTAAACTTGAACCAGCAACATCAATTAAACCTAGCAGCTTAAAACT  
37 CAGGTCAAAACATTTTAAACTTGAACCAGCAACATCAATTAAACCTAGCAGCTTAAAACT  
91 CAGGTCAAAACATTTTAAACTTGAACCAGCAACATCAATTAAACCTAGCAGCTTAAAACT  
140 CAGGTCAAAACATTTTAAACTTGAACCAGCAACATCAATTTAACCTAGCAGCTTAGAACT  
167 CAGGTCAAAACATTTTAAACTTGAACCAGCAACATCAATTTAACCTAGCAGCTTAGAACT  
\*\*\*\*\*

172 TTAAATTAAAATAGGAAAACTGTGATGGCAACTAAGGAGTGAAATAGAAAGGGGGAAAA  
229 TTAAATTAAAATAGGAAAACTGTGATGGCAACTAAGGAGTGAAATAGAAAGGGGGAAAA  
208 TTAAATTAAAATAGGAAAACTGTGATGGCAACTAAGGAGTGAAATAGAAAGGGGGAAAA  
83 TTAAATTAAAATAGGAAAACTGTGATGGCAACTAAGGAGTGAAATAGAAAGGGGGGGAA  
3 TTAAATTAAAATAGGAAAACTGTGATGGCAACTAAGGAGTGAAATAGAAAGGGGGGGAA  
120 TTAAATTAAAATAGGAAAACTGTGATGGCAACTAAGGAGTGAAATAGAAAGGGGGGAGAA  
99 TTAAATTAAAATAGGAAAACTGTGATGGCAACTAAGGAGTGAAATAGAAAGGGGGGGAA  
126 TTAAATTAAAATAGGAAAACTGTGATGGCGACTAAGGAGTGAAATAGAAAGGGGGGAGAA  
173 TTAAATTAAAATAGGAAAACTGTGATGGCGACTAAGGAGTGAAATAGAAAGGGGGGAGAA  
204 TTAAATTAAAATAGGAAAACTGTGATGGCAACTAAGGAGTGAAATAGAAAGGGGGAGAA  
239 TTAAATTAAAATAGGAAAACTGTGATGGCAACTAAGGAGTGAAATAGAAAGGGGGGAGAA  
117 TTAAATTAAAATAGGAAAACTGTGATGGCAACTAAGGAGTGAAATAGAAAGGGGGGAGAA  
123 TTAAATTAAAATAGGAAAACTGTGATGGCAACTAAGGAGTGAAATAGAAAGGGGGGAGAA  
210 TTAAATTAAAATAGGAAAACTGTGATGGCGACTAAGGAGTGAAATAGAAAGGGGGGAGAA  
86 TTAAATTAAAATAGGAAAACTGTGATGGCGACTAAGGAGTGAAATAGAAAGGGGGGAGAA  
100 TTAAATTAAAATAGGAAAACTGTGATGGCGACTAAGGAGTGAAATAGAAAGGGGGGAGAA  
114 TTAAATTAAAATAGGAAAACTGTGATGGCGACTAAGGAGTGAAATAGAAAGGGGGGAGAA  
170 TTAAATTAAAATAGGAAAACTGTGATGGCGACTAAGGAGTGAAATAGAAAGGGGGGAGAA  
108 TTAAATTAAAATAGGAAAACTGTGATGGCAACTAAGGAGTGAAATAGAAAGGGGGGGAA  
174 TTAAATTAAAATAGGAAAACTGTGATGGCAACTAAGGAGTGAAATAGAAAGGGGGGGAA  
158 TTAAATTAAAATAGGAAAACTGTGATGGCAACTAAGGAGTGAAATAGAAAGGGGGGGAA  
154 TTAAATTAAAATAGGAAAACTGTGATGGCAACTAAGGAGTGAAATAGAAAGGGGGGGAA  
30 TTAAATTAAAATAGGAAAACTGTGATGGCAACTAAGGAGTGAAATAGAAAGGGGGGAGAA  
39 TTAAATTAAAATAGGAAAACTGTGATGGCAACTAAGGAGTGAAATAGAAAGGGGGGAGAA  
237 TTAAATTAAAATAGGAAAACTGTGATGGCAACTAAGGAGTGAAATAGAAAGGGGGGGAA  
65 TTAAATTAAAATAGGAAAACTGTGATGGCAACTAAGGAGTGAAATAGAAAGGGGGGGAA  
44 TTAAATTAAAATAGGAAAACTGTGATGGCAACTAAGGAGTGAAATAGAAAGGGGGGAGAA  
168 TTAAATTAAAATAGGAAAACTGTGATGGCGACTAAGGAGTGAAATAGAAAGGGGGGAA  
95 TTAAATTAAAATAGGAAAACTGTGATGGCAACTAAGGAGTGAAATAGAAAGGGGGAAAA  
22 TTAAATTAAAATAGGAAAACTGTGATGGCAACTAAGGAGTGAAATAGAAAGGGGGGAA  
79 TTAAATTAAAATAGGAAAACTGTGATGGCAACTAAGGAGTGAAATAGAAAGGGGGGAA  
211 TTAAATTAAAATAGGAAAACTGTGATGGCAACTAAGGAGTGAAATAGAAAGGGGGGAA  
88 TTAAATTAAAATAGGAAAACTGTGATGGCAACTAAGGAGTGAAATAGAAAGGGGAGAA  
184 TTAAATTAAAATAGGAAAACTGTGATGGCAACTAAGGAGTGAAATAGAAAGGGGAGAA  
78 TTAAATTAAAATAGGAAAACTGTGATGGCAACTAAGGAGTGAAATAGAAAGGGGAGAA  
71 TTAAATTAAAATAGGAAAACTGTGATGGCAACTAAGGAGTGAAATAGAAAGGGGGGGAA  
196 TTAAATTAAAATAGGAAAACTGTGATGGCAACTAAGGAGTGAAATAGAAAGGGGGGGAA  
43 TTAAATTAAAATAGGAAAACTGTGATGGCAACTAAGGAGTGAAATAGAAAGGGGGGGAA

[illegible]

|     |                       |
|-----|-----------------------|
| 171 | TTAAATTAAAAATAGGAAAAA |
| 205 | TTAAATTAAAAATAGGAAAAA |
| 75  | TTAAATTAAAAATAGGAAAAA |
| 62  | TTAAATTAAAAATAGGAAAAA |
| 4   | TTAAATTAAAAATAGGAAAAA |
| 7   | TTAAATTAAAAATAGGAAAAA |
| 25  | TTAAATTAAAAATAGGAAAAA |
| 28  | TTAAATTAAAAATAGGAAAAA |
| 36  | TTAAATTAAAAATAGGAAAAA |
| 49  | TTAAATTAAAAATAGGAAAAA |
| 145 | TTAAATTAAAAATAGGAAAAA |
| 181 | TTAAATTAAAAATAGGAAAAA |
| 188 | TTAAATTAAAAATAGGAAAAA |
| 59  | TTAAATTAAAAATAGGAAAAA |
| 121 | TTAAATTAAAAATAGGAAAAA |
| 127 | TTAAATTAAAAATAGGAAAAA |
| 135 | TTAAATTAAAAATAGGAAAAA |
| 136 | TTAAATTAAAAATAGGAAAAA |
| 29  | TTAAATTAAAAATAGGAAAAA |
| 89  | TTAAATTAAAAATAGGAAAAA |
| 216 | TTAAATTAAAAATAGGAAAAA |
| 164 | TTAAATTAAAAATAGGAAAAA |
| 63  | TTAAATTAAAAATAGGAAAAA |
| 161 | TTAAATTAAAAATAGGAAAAA |
| 183 | TTAAATTAAAAATAGGAAAAA |
| 18  | TTAAATTAAAAATAGGAAAAA |
| 90  | TTAAATTAAAAATAGGAAAAA |
| 162 | TTAAATTAAAAATAGGAAAAA |
| 177 | TTAAATTAAAAATAGGAAAAA |
| 97  | TTAAATTAAAAATAGGAAAAA |
| 231 | TTAAATTAAAAATAGGAAAAA |
| 143 | TTAAATTAAAAATAGGAAAAA |
| 11  | TTAAATTAAAAATAGGAAAAA |
| 153 | TTAAATTAAAAATAGGAAAAA |
| 138 | TTAAATTAAAAATAGGAAAAA |
| 185 | TTAAATTAAAAATAGGAAAAA |
| 194 | TTAAATTAAAAATAGGAAAAA |
| 236 | TTAAATTAAAAATAGGAAAAA |
| 32  | TTAAATTAAAAATAGGAAAAA |
| 52  | TTAAATTAAAAATAGGAAAAA |
| 60  | TTAAATTAAAAATAGGAAAAA |
| 72  | TTAAATTAAAAATAGGAAAAA |
| 112 | TTAAATTAAAAATAGGAAAAA |
| 141 | TTAAATTAAAAATAGGAAAAA |
| 155 | TTAAATTAAAAATAGGAAAAA |
| 1   | TTAAATTAAAAATAGGAAAAA |
| 6   | TTAAATTAAAAATAGGAAAAA |
| 58  | TTAAATTAAAAATAGGAAAAA |
| 68  | TTAAATTAAAAATAGGAAAAA |
| 180 | TTAAATTAAAAATAGGAAAAA |
| 81  | TTAAATTAAAAATAGGAAAAA |
| 103 | TTAAATTAAAAATAGGAAAAA |
| 113 | TTAAATTAAAAATAGGAAAAA |
| 163 | TTAAATTAAAAATAGGAAAAA |
| 40  | TTAAATTAAAAATAGGAAAAA |
| 56  | TTAAATTAAAAATAGGAAAAA |
| 218 | TTAAATTAAAAATAGGAAAAA |

[illegible][illegible]



[illegible]

[illegible]

```

91      AGAGTTAATTATCGTTGACTAGTAAATGTACCCCAAGTTTTTCTTCAAGTTCCTTCCCTC
140     AGAGTTAATTATCGTTGACTAGTAAATGTACCCCAAGTTTTTCTTCAAGTTCCTTCCCTC
167     AGAGTTAATTATCGTTGACTAGTAAATGTACCCCAAGTTTTTCTTCAAGTTCCTTCCCTC
*****

```

[illegible]

[illegible]



[illegible]

[illegible]

[illegible]

172 TGCGATCTAGATAAACAGAGCCATTATGAAGTAAAAAA  
229 TGCGATCTAGATAAACAGAGCCATTATGAAGTAAAAAA  
208 TGCGATCTAGATAAACAGAGCCATTATGAAGTAAAAAA  
83 TGCAATCTAGATAAACAGAGCCATTATGAAGTAAAAAA  
3 TGCAATCTAGATAAACAGAGCCATTATGAAGTAAAAAA  
120 TGCAATCTAGATAAACAGAGCCATTATGAAGTAAAAAA  
99 TGCAATCTAGATAAACAGAGCCATTATGAAGTAAAAAA  
126 TGCAATCTAGATAAACAGAGCCATTATGAAGTAAAAAA  
173 TGCAATCTAGATAAACAGAGCCATTATGAAGTAAAAAA



204 TGCAATCTAGATAAACAGAGCCATTATGAAGTAAAAAA  
239 TGCAATCTAGATAAACAGAGCCATTATGAAGTAAAAAA  
117 TGCAATCTAGATAAACAGAGCCATTATGAAGTAAAAAA  
123 TGCAATCTAGATAAACAGAGCCATTATGAAGTAAAAAA  
210 TGCGATCTAGATAAACAGAGCCATTATGAAGTAAAAAA  
86 TGCGATCTAGATAAACAGAGCCATTATGAAGTAAAAAA  
100 TGCGATCTAGATAAACAGAGCCATTATGAAGTAAAAAA  
114 TGCGATCTAGATAAACAGAGCCATTATGAAGTAAAAAA  
170 TGCGATCTAGATAAACAGAGCCATTATGAAGTAAAAAA  
108 TGCAATCTAGATAAACAGAGCCATTATGAAGTAAAAAA  
174 TGCAATCTAGATAAACAGAGCCATTATGAAGTAAAAAA  
158 TGCGATCTAGATAAACAGAGCCATTATGAAGTAAAAAA  
154 TGCAATCTAGATAAACAGAGCCATTATGAAGTAAAAAA  
30 TGCAATCTAGATAAACAGAGCCATTATGAAGTAAAAAA  
39 TGCAATCTAGATAAACAGAGCCATTATGAAGTAAAAAA  
237 TGCAATCTAGATAAACAGAGCCATTATGAAGTAAAAAA  
65 TGCAATCTAGATAAACAGAGCCATTATGAAGTAAAAAA  
44 TGCAATCTAGATAAACAGAGCCATTATGAAGTAAAAAA  
168 TGCAATCTAGATAAACAGAGCCATTATGAAGTAAAAAA  
95 TGCAATCTAGATAAACAGAGCCATTATGAAGTAAAAAA  
22 TGCGATCTAGATAAACAGAGCCATTATGAAGTAAAAAA  
79 TGCAATCTAGATAAACAGAGCCATTATGAAGTAAAAAA  
211 TGCAATCTAGATAAACAGAGCCATTATGAAGTAAAAAA  
88 TGCGATCTAGATAAACAGAGCCATTATGAAGTAAAAAA  
184 TGCGATCTAGATAAACAGAGCCATTATGAAGTAAAAAA  
78 TGCAATCTAGATAAACAGAGCCATTATGAAGTAAAAAA  
71 TGCAATCTAGATAAACAGAGCCATTATGAAGTAAAAAA  
196 TGCAATCTAGATAAACAGAGCCATTATGAAGTAAAAAA  
43 TGCAATCTAGATAAACAGAGCCATTATGAAGTAAAAAA  
151 TGCAATCTAGATAAACAGAGCCATTATGAAGTAAAAAA  
27 TGCAATCTAGATAAACAGAGCCATTATGAAGTAAAAAA  
197 TGCAATCTAGATAAACAGAGCCATTATGAAGTAAAAAA  
109 TGCAATCTAGATAAACAGAGCCATTATGAAGTAAAAAA  
169 TGCAATCTAGATAAACAGAGCCATTATGAAGTAAAAAA  
94 TGCGATCTAGATAAACAGAGCCATTATGAAGTAAAAAA  
232 TGCGATCTAGATAAACAGAGCCATTATGAAGTAAAAAA  
222 TGCAATCTAGATAAACAGAGCCATTATGAAGTAAAAAA  
24 TGCAATCTAGATAAACAGAGCCATTATGAAGTAAAAAA  
15 TGCAATCTAGATAAACAGAGCCATTATGAAGTAAAAAA  
13 TGCAATCTAGATAAACAGAGCCATTATGAAGTAAAAAA  
14 TGCAATCTAGATAAACAGAGCCATTATGAAGTAAAAAA  
35 TGCAATCTAGATAAACAGAGCCATTATGAAGTAAAAAA  
111 TGCAATCTAGATAAACAGAGCCATTATGAAGTAAAAAA  
157 TGCAATCTAGATAAACAGAGCCATTATGAAGTAAAAAA  
31 TGCAATCTAGATAAACAGAGCCATTATGAAGTAAAAAA  
47 TGCAATCTAGATAAACAGAGCCATTATGAAGTAAAAAA  
33 TGCAATCTAGATAAACAGAGCCATTATGAAGTAAAAAA  
51 TGCAATCTAGATAAACAGAGCCATTATGAAGTAAAAAA  
85 TGCAATCTAGATAAACAGAGCCATTATGAAGTAAAAAA  
54 TGCAATCTAGATAAACAGAGCCATTATGAAGTAAAAAA  
96 TGCAATCTAGATAAACAGAGCCATTATGAAGTAAAAAA  
61 TGCAATCTAGATAAACAGAGCCATTATGAAGTAAAAAA  
80 TGCAATCTAGATAAACAGAGCCATTATGAAGTAAAAAA  
82 TGCAATCTAGATAAACAGAGCCATTATGAAGTAAAAAA  
129 TGCAATCTAGATAAACAGAGCCATTATGAAGTAAAAAA  
46 TGCAATCTAGATAAACAGAGCCATTATGAAGTAAAAAA  
74 TGCAATCTAGATAAACAGAGCCATTATGAAGTAAAAAA

101 TGCAATCTAGATAAACAGAGCCATTATGAAGTAAAAAA  
66 TGCAATCTAGATAAACAGAGCCATTATGAAGTAAAAAA  
104 TGCAATCTAGATAAACAGAGCCATTATGAAGTAAAAAA  
118 TGCAATCTAGATAAACAGAGCCATTATGAAGTAAAAAA  
21 TGCAATCTAGATAAACAGAGCCATTATGAAGTAAAAAA  
77 TGCAATCTAGATAAACAGAGCCATTATGAAGTAAAAAA  
124 TGCAATCTAGATAAACAGAGCCATTATGAAGTAAAAAA  
20 TGCAATCTAGATAAACAGAGCCATTATGAAGTAAAAAA  
110 TGCAATCTAGATAAACAGAGCCATTATGAAGTAAAAAA  
70 TGCAATCTAGATAAACAGAGCCATTATGAAGTAAAAAA  
8 TGCAATCTAGATAAACAGAGCCATTATGAAGTAAAAAA  
55 TGCAATCTAGATAAACAGAGCCATTATGAAGTAAAAAA  
64 TGCAATCTAGATAAACAGAGCCATTATGAAGTAAAAAA  
93 TGCAATCTAGATAAACAGAGCCATTATGAAGTAAAAAA  
202 TGCAATCTAGATAAACAGAGCCATTATGAAGTAAAAAA  
10 TGCAATCTAGATAAACAGAGCCATTATGAAGTAAAAAA  
16 TGCAATCTAGATAAACAGAGCCATTATGAAGTAAAAAA  
76 TGCAATCTAGATAAACAGAGCCATTATGAAGTAAAAAA  
116 TGCAATCTAGATAAACAGAGCCATTATGAAGTAAAAAA  
220 TGCAATCTAGATAAACAGAGCCATTATGAAGTAAAAAA  
234 TGCAATCTAGATAAACAGAGCCATTATGAAGTAAAAAA  
2 TGCAATCTAGATAAACAGAGCCATTATGAAGTAAAAAA  
38 TGCAATCTAGATAAACAGAGCCATTATGAAGTAAAAAA  
73 TGCAATCTAGATAAACAGAGCCATTATGAAGTAAAAAA  
87 TGCAATCTAGATAAACAGAGCCATTATGAAGTAAAAAA  
92 TGCAATCTAGATAAACAGAGCCATTATGAAGTAAAAAA  
98 TGCAATCTAGATAAACAGAGCCATTATGAAGTAAAAAA  
137 TGCAATCTAGATAAACAGAGCCATTATGAAGTAAAAAA  
19 TGCAATCTAGATAAACAGAGCCATTATGAAGTAAAAAA  
171 TGCAATCTAGATAAACAGAGCCATTATGAAGTAAAAAA  
205 TGCAATCTAGATAAACAGAGCCATTATGAAGTAAAAAA  
75 TGCAATCTAGATAAACAGAGCCATTATGAAGTAAAAAA  
62 TGCAATCTAGATAAACAGAGCCATTATGAAGTAAAAAA  
4 TGCAATCTAGATAAACAGAGCCATTATGAAGTAAAAAA  
7 TGCAATCTAGATAAACAGAGCCATTATGAAGTAAAAAA  
25 TGCAATCTAGATAAACAGAGCCATTATGAAGTAAAAAA  
28 TGCAATCTAGATAAACAGAGCCATTATGAAGTAAAAAA  
36 TGCAATCTAGATAAACAGAGCCATTATGAAGTAAAAAA  
49 TGCAATCTAGATAAACAGAGCCATTATGAAGTAAAAAA  
145 TGCAATCTAGATAAACAGAGCCATTATGAAGTAAAAAA  
181 TGCAATCTAGATAAACAGAGCCATTATGAAGTAAAAAA  
188 TGCAATCTAGATAAACAGAGCCATTATGAAGTAAAAAA  
59 TGCAATCTAGATAAACAGAGCCATTATGAAGTAAAAAA  
121 TGCAATCTAGATAAACAGAGCCATTATGAAGTAAAAAA  
127 TGCAATCTAGATAAACAGAGCCATTATGAAGTAAAAAA  
135 TGCAATCTAGATAAACAGAGCCATTATGAAGTAAAAAA  
136 TGCAATCTAGATAAACAGAGCCATTATGAAGTAAAAAA  
29 TGCAATCTAGATAAACAGAGCCATTATGAAGTAAAAAA  
89 TGCAATCTAGATAAACAGAGCCATTATGAAGTAAAAAA  
216 TGCAATCTAGATAAACAGAGCCATTATGAAGTAAAAAA  
164 TGCAATCTAGATAAACAGAGCCATTATGAAGTAAAAAA  
63 TGCAATCTAGATAAACAGAGCCATTATGAAGTAAAAAA  
161 TGCAATCTAGATAAACAGAGCCATTATGAAGTAAAAAA  
183 TGCAATCTAGATAAACAGAGCCATTATGAAGTAAAAAA  
18 TGCAATCTAGATAAACAGAGCCATTATGAAGTAAAAAA  
90 TGCAATCTAGATAAACAGAGCCATTATGAAGTAAAAAA  
162 TGCAATCTAGATAAACAGAGCCATTATGAAGTAAAAAA

177 TGCAATCTAGATAAACAGAGCCATTATGAAGTAAAAAA  
97 TGCAATCTAGATAAACAGAGCCATTATGAAGTAAAAAA  
231 TGCAATCTAGATAAACAGAGCCATTATGAAGTAAAAAA  
143 TGCAATCTAGATAAACAGAGCCATTATGAAGTAAAAAA  
11 TGCAATCTAGATAAACAGAGCCATTATGAAGTAAAAAA  
153 TGCAATCTAGATAAACAGAGCCATTATGAAGTAAAAAA  
138 TGCAATCTAGATAAACAGAGCCATTATGAAGTAAAAAA  
185 TGCAATCTAGATAAACAGAGCCATTATGAAGTAAAAAA  
194 TGCAATCTAGATAAACAGAGCCATTATGAAGTAAAAAA  
236 TGCAATCTAGATAAACAGAGCCATTATGAAGTAAAAAA  
32 TGCAATCTAGATAAACAGAGCCATTATGAAGTAAAAAA  
52 TGCAATCTAGATAAACAGAGCCATTATGAAGTAAAAAA  
60 TGCAATCTAGATAAACAGAGCCATTATGAAGTAAAAAA  
72 TGCAATCTAGATAAACAGAGCCATTATGAAGTAAAAAA  
112 TGCAATCTAGATAAACAGAGCCATTATGAAGTAAAAAA  
141 TGCAATCTAGATAAACAGAGCCATTATGAAGTAAAAAA  
155 TGCAATCTAGATAAACAGAGCCATTATGAAGTAAAAAA  
1 TGCAATCTAGATAAACAGAGCCATTATGAAGTAAAAAA  
6 TGCAATCTAGATAAACAGAGCCATTATGAAGTAAAAAA  
58 TGCAATCTAGATAAACAGAGCCATTATGAAGTAAAAAA  
68 TGCAATCTAGATAAACAGAGCCATTATGAAGTAAAAAA  
180 TGCAATCTAGATAAACAGAGCCATTATGAAGTAAAAAA  
81 TGCAATCTAGATAAACAGAGCCATTATGAAGTAAAAAA  
103 TGCAATCTAGATAAACAGAGCCATTATGAAGTAAAAAA  
113 TGCAATCTAGATAAACAGAGCCATTATGAAGTAAAAAA  
163 TGCAATCTAGATAAACAGAGCCATTATGAAGTAAAAAA  
40 TGCAATCTAGATAAACAGAGCCATTATGAAGTAAAAAA  
56 TGCAATCTAGATAAACAGAGCCATTATGAAGTAAAAAA  
218 TGCAATCTAGATAAACAGAGCCATTATGAAGTAAAAAA  
41 TGCAATCTAGATAAACAGAGCCATTATGAAGTAAAAAA  
42 TGCAATCTAGATAAACAGAGCCATTATGAAGTAAAAAA  
160 TGCAATCTAGATAAACAGAGCCATTATGAAGTAAAAAA  
5 TGCAATCTAGATAAACAGAGCCATTATGAAGTAAAAAA  
228 TGCAATCTAGATAAACAGAGCCATTATGAAGTAAAAAA  
17 TGCAATCTAGATAAACAGAGCCATTATGAAGTAAAAAA  
37 TGCAATCTAGATAAACAGAGCCATTATGAAGTAAAAAA  
91 TGCAATCTAGATAAACAGAGCCATTATGAAGTAAAAAA  
140 TGCAATCTAGATAAACAGAGCCATTATGAAGTAAAAAA  
167 TGCGATCTAGATAAACAGAGCCATTATGAAGTAAAAAA  
\*\*\* \*\*\*\*\*

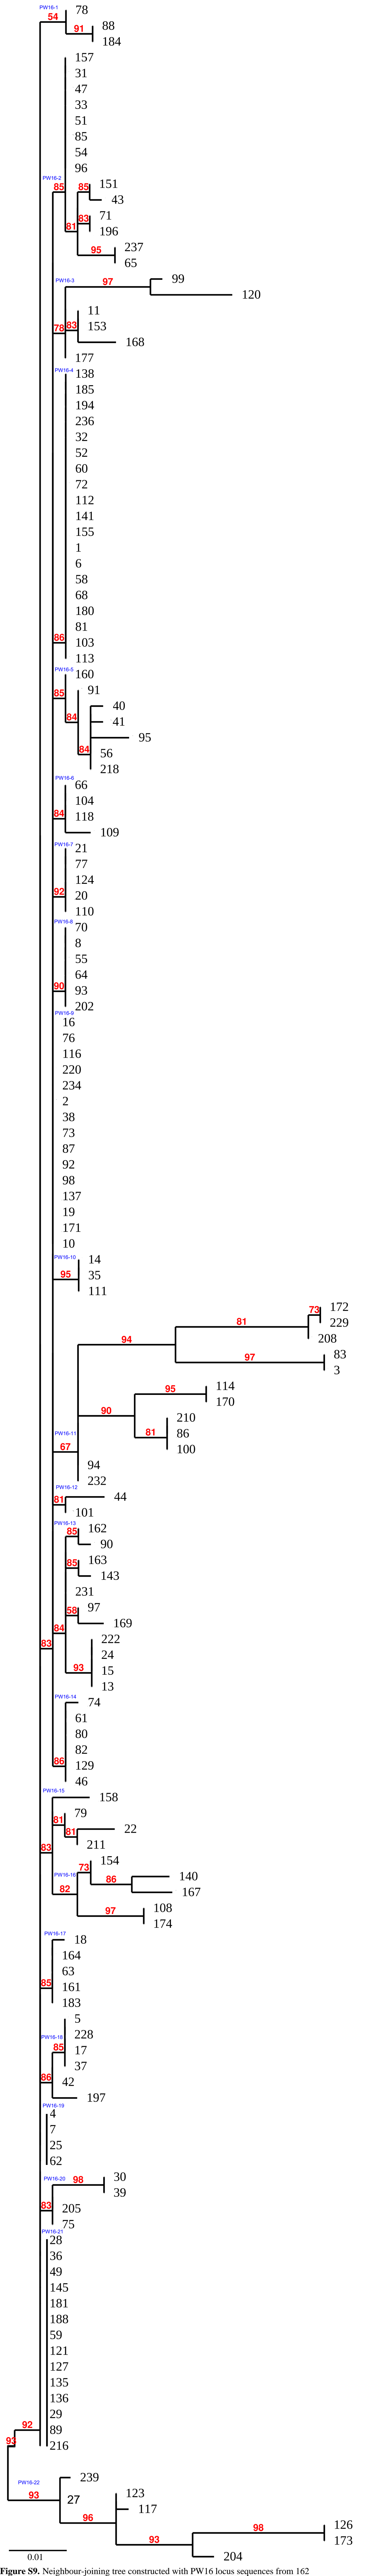

**Figure S9.** Neighbour-joining tree constructed with PW16 locus sequences from 162 *P. quinquefolius* samples from a commercial ginseng garden near Simcoe, Ontario. Sample number is shown in black, and cluster designation (PW16-1 to PW16-22) is shown in blue. Bootstrap support values from 1000 replicates are shown in red at the nodes. Scale bar is at bottom.

**Table S1.** Root parameters separated by root grade.

| Root grade | Root fresh wt (g) |                | Root dry wt (g) |   | Water content (%) |   |
|------------|-------------------|----------------|-----------------|---|-------------------|---|
| Pencil     | 13.50             | B <sup>a</sup> | 3.85            | B | 28.17             | A |
| Chunk      | 18.31             | A              | 5.27            | A | 29.58             | A |
| Fork       | 18.78             | A              | 5.49            | A | 26.66             | A |
| Spider     | 21.36             | A              | 5.98            | A | 26.87             | A |

<sup>a</sup> Values within a column followed by a letter in common are not significantly different at  $p = 0.05$  according to Fisher's protected Least Significant Difference test (LSD).

**Table S2.** Leaf parameters separated by root grade.

| Root grade | Leaves per plant    | Leaflets per plant | Leaf area (cm) | Leaf fresh wt (g) | Leaf dry wt (g) | Water content (%) |
|------------|---------------------|--------------------|----------------|-------------------|-----------------|-------------------|
| Pencil     | 3.04 A <sup>a</sup> | 13.84 B            | 23.15 B        | 4.97 B            | 1.34 B          | 28.65 A           |
| Chunk      | 3.00 A              | 13.56 A            | 28.81 A        | 6.47 A            | 1.60 A          | 25.80 B           |
| Fork       | 3.09 A              | 13.50 A            | 29.80 A        | 6.35 A            | 1.58 A          | 25.99 B           |
| Spider     | 3.03 A              | 13.39 A            | 29.70 A        | 6.52 A            | 1.61 A          | 26.45 AB          |

<sup>a</sup> Values within a column followed by a letter in common are not significantly different at  $p = 0.05$  according to Fisher's protected Least Significant Difference test (LSD).

**Table S3.** Petiole and stem parameters separated by root grade.

| <b>Root grade</b> | <b>Petiole fresh wt (g)</b> | <b>Petiole dry wt (g)</b> | <b>Water content (%)</b> | <b>Stem length (cm)</b> | <b>Stem fresh wt (g)</b> | <b>Stem dry wt (g)</b> | <b>Water content (%)</b> |
|-------------------|-----------------------------|---------------------------|--------------------------|-------------------------|--------------------------|------------------------|--------------------------|
| Pencil            | 1.45 B <sup>a</sup>         | 0.19 B                    | 13.14 A                  | 29.23 B                 | 4.16 B                   | 0.58 B                 | 13.50 A                  |
| Chunk             | 2.00 A                      | 0.26 A                    | 12.98 A                  | 32.13 A                 | 4.96 AB                  | 0.71 AB                | 14.30 A                  |
| Fork              | 1.98 A                      | 0.26 A                    | 12.61 A                  | 31.11 AB                | 5.53 A                   | 0.78 A                 | 13.87 A                  |
| Spider            | 1.94 A                      | 0.28 A                    | 14.01 A                  | 30.10 AB                | 5.46 A                   | 0.82 A                 | 14.77 A                  |

<sup>a</sup> Values within a column followed by a letter in common are not significantly different at  $p = 0.05$  according to Fisher's protected Least Significant Difference test (LSD).

**Table S4.** Seed parameters separated b root grade.

| Root grade | Seed petiole length |                | Seed petioles fresh wt (g) |    | Seed petioles dry wt (g) |   | Water content (%) |   | Seed petiolules per plant |   | Total seeds per plant |   | Seed fresh wt (g) |   | Seed dry wt (g) |   | Water content (%) |   |
|------------|---------------------|----------------|----------------------------|----|--------------------------|---|-------------------|---|---------------------------|---|-----------------------|---|-------------------|---|-----------------|---|-------------------|---|
| Pencil     | 09.82               | A <sup>a</sup> | 0.42                       | B  | 0.10                     | B | 23.64             | A | 42.59                     | A | 0.52                  | A | 1.98              | A | 0.43            | A | 19.43             | A |
| Chunk      | 10.89               | A              | 0.52                       | AB | 0.14                     | A | 27.58             | A | 39.94                     | A | 0.66                  | A | 2.06              | A | 0.44            | A | 21.33             | A |
| Fork       | 11.33               | A              | 0.50                       | AB | 0.14                     | A | 27.52             | A | 45.54                     | A | 0.63                  | A | 1.97              | A | 0.38            | A | 18.71             | A |
| Spider     | 11.04               | A              | 0.56                       | A  | 0.14                     | A | 24.15             | A | 44.29                     | A | 0.70                  | A | 1.74              | A | 0.38            | A | 20.70             | A |

a Values within a column followed by a letter in common are not significantly different at  $p = 0.05$  according to Fisher's protected Least Significant Difference test (LSD).



**Table S5.** Root, leaves, and leaf petiole growth parameters of *P. quinquefolius*. At 3-year old, root fresh weight, root dry weight, leaves per plant, and leaf petiole dry weight for different groups were recorded.

| Group no. | Root fresh weight (g) | Root dry weight (g) | Leaves per plant | Leaf petiole dry weight (g) |
|-----------|-----------------------|---------------------|------------------|-----------------------------|
| 1         | 18.73 A               | 5.38 A              | 2.67 A           | 0.26 A                      |
| 2         | 19.27 A               | 5.44 A              | 2.79 A           | 0.27 A                      |
| 3         | 18.33 A               | 5.52 A              | 2.67 A           | 0.21 A                      |
| 4         | 17.08 A               | 4.73 A              | 3.32 A           | 0.24 A                      |
| 5         | 20.32 A               | 5.88 A              | 2.86 A           | 0.30 A                      |
| 6         | 18.01 A               | 4.94 A              | 3.00 A           | 0.23 A                      |
| 7         | 21.03 A               | 6.44 A              | 3.00 A           | 0.30 A                      |
| 8         | 12.50 A               | 3.20 A              | 3.33 A           | 0.21 A                      |
| 9         | 14.06 A               | 3.76 A              | 3.00 A           | 0.21 A                      |
| 10        | 13.77 A               | 3.79 A              | 2.67 A           | 0.17 A                      |
| 11        | 22.14 A               | 6.60 A              | 3.42 A           | 0.29 A                      |
| 12        | 17.11 A               | 5.26 A              | 3.00 A           | 0.25 A                      |
| 13        | 14.31 A               | 4.20 A              | 3.09 A           | 0.19 A                      |
| 14        | 13.24 A               | 3.40 A              | 3.00 A           | 0.18 A                      |
| 15        | 12.50 A               | 3.10 A              | 3.25 A           | 0.21 A                      |
| 16        | 15.27 A               | 4.44 A              | 3.00 A           | 0.18 A                      |
| 17        | 17.61 A               | 5.44 A              | 3.20 A           | 0.22 A                      |
| 18        | 15.89 A               | 4.61 A              | 3.00 A           | 0.19 A                      |
| 19        | 15.18 A               | 4.59 A              | 3.00 A           | 0.21 A                      |
| 20        | 14.98 A               | 4.14 A              | 3.00 A           | 0.20 A                      |
| 21        | 17.28 A               | 4.87 A              | 2.93 A           | 0.23 A                      |
| 22        | 12.80 A               | 3.72 A              | 3.00 A           | 0.18 A                      |
